# Supplementary material for: Insights into the Conformation of the Membrane Proximal Regions Critical to the Trimerization of the HIV-1 gp41 Ectodomain Bound to Dodecyl Phosphocholine Micelles
Source: PLOS journal article supplement (doi:10.1371/journal.pone.0160597), 2016-08-11

**S7 Fig. Raw DEER data acquired with spin labels in different positions of the 17-172 construct at pH 4 in the presence of DPC.**

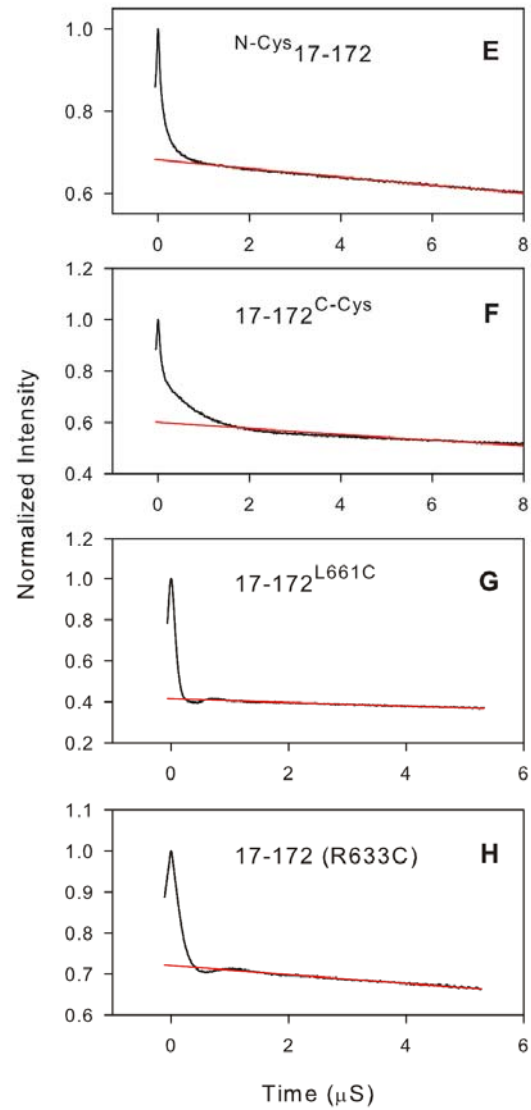

Supplement: S7 (10.1371/journal.pone.0160597.s007) [file journal.pone.0160597.s007]
